# Supplementary material for: HILIC–MRM–MS for Linkage-Specific Separation of Sialylated Glycopeptides to Quantify Prostate-Specific Antigen Proteoforms
Source: PubMed Central journal article supplement — J Proteome Res. 2020 Mar 6;19(7):2708–16. doi: 10.1021/acs.jproteome.0c00050 (PMC8280738; doi:10.1021/acs.jproteome.0c00050), 2020-03-06
Supplement: pr0c00050_si_001.pdf [file pr0c00050_si_001.pdf]

Supplementary information associated with

## **HILIC-MRM-MS for linkage-specific separation of sialylated glycopeptides to quantify Prostate-Specific Antigen Proteoforms**

Yuri van der Burgt, Kasper M. Siliakus, Christa M. Cobbaert, L. Renee Ruhaak

Department of Clinical Chemistry and Laboratory Medicine, Leiden University Medical Center, Albinusdreef 2 2333 ZA Leiden, The Netherlands

### **Table of Content**

1. Supplementary Table S1. Transitions developed for tryptic peptides and glycopeptides from PSA S-1
2. Supplementary Table S2. Transitions developed for ArgC peptides and glycopeptides from PSA S-2
3. Supplementary Figure S1. Optimization of digestion conditions S-3
4. Supplementary Figure S2. Repeatability of the LC-MRM-MS analysis of PSA S-4

## Tables

**Supplementary Table S1.** Transitions developed for tryptic peptides and glycopeptides from PSA.

| AA      | peptide                  | RT            | Precursor   | Quantifier     |    | Qualifier 1      |    | Qualifier 2    |    |
|---------|--------------------------|---------------|-------------|----------------|----|------------------|----|----------------|----|
|         |                          | min           | m/z         | m/z            | CE | m/z              | CE | m/z            | CE |
| 25-33   | IVGGWECEK                | 3.4           | 539.2 (2+)  | 865.4 (y7, 1+) | 15 | 964.4 (y8, 1+)   | 18 | 213.2 (b2, 1+) | 15 |
| 110-125 | FLRPGDDSSHDLMMLR         | 3.2           | 468.7 (4+)  | 532.3 (y4, 1+) | 15 | 760.4 (y6, 1+)   | 18 | 645.4 (y5, 1+) | 18 |
| 126-137 | LSEPAELTDAVK             | 3.6           | 636.8 (2+)  | 943.5 (y9, 1+) | 18 | 1072.6 (y10, 1+) | 20 | 201.2 (b2, 1+) | 22 |
| -       | SIL-<br>FLRPGDDSSHDLMMLR | 3.2           | 471.2 (4+)  | 542.3 (y4, 1+) | 15 | 770.4 (y6, 1+)   | 18 | 655.4 (y5, 1+) | 18 |
| -       | SIL-LSEPAELTDAVK         | 3.6           | 640.8 (2+)  | 951.5(y9, 1+)  | 18 | 1080.6 (y10, 1+) | 20 | 201.2 (b2, 1+) | 22 |
| 69-70   | NK-H5N4F1S2              | 6.2, 6.3, 6.4 | 871.3 (3+)  | 204.0 (1+)     | 30 | 274.0 (1+)       | 30 | -              | -  |
| 69-70   | NK-H5N4F0S2              |               | 822.6 (3+)  | 204.0 (1+)     | 30 | 274.0 (1+)       | 30 | -              | -  |
| 69-70   | NK-H4N5F1S2              |               | 885.0 (3+)  | 204.0 (1+)     | 30 | 274.0 (1+)       | 30 | -              | -  |
| 69-70   | NK-H4N5F0S2              |               | 836.3 (3+)  | 204.0 (1+)     | 30 | 274.0 (1+)       | 30 | -              | -  |
| 69-70   | NK-H3N6F1S2              |               | 898.7 (3+)  | 204.0 (1+)     | 30 | 274.0 (1+)       | 30 | -              | -  |
| 69-70   | NK-H5N4F1S1              |               | 774.3 (2+)  | 204.0 (1+)     | 30 | 274.0 (1+)       | 30 | -              | -  |
| 69-70   | NK-H4N3F1S1              |               | 978.4 (2+)  | 204.0 (1+)     | 30 | 274.0 (1+)       | 30 | -              | -  |
| 69-70   | NK-H4N3F0S1              |               | 905.4 (2+)  | 204.0 (1+)     | 30 | 274.0 (1+)       | 30 | -              | -  |
| 69-70   | NK-H3N4F1S1              |               | 998.9 (2+)  | 204.0 (1+)     | 30 | 274.0 (1+)       | 30 | -              | -  |
| 69-70   | NK-H5N4F1S0              |               | 1015.4 (2+) | 204.0 (1+)     | 30 | 366.0 (1+)       | 30 | -              | -  |
| 69-70   | NK-H4N3F1S0              |               | 832.8 (2+)  | 204.0 (1+)     | 30 | 366.0 (1+)       | 30 | -              | -  |
| 69-70   | NK-H4N4F1S0              |               | 934.4 (2+)  | 204.0 (1+)     | 30 | 366.0 (1+)       | 30 | -              | -  |
| 69-70   | NK-H4N5F1S0              |               | 1035.9 (2+) | 204.0 (1+)     | 30 | 366.0 (1+)       | 30 | -              | -  |

**Supplementary Table S2.** Transitions developed for ArgC peptides and glycopeptides from PSA

| AA      | peptide              | Precursor  | Quantifier     |    | Qualifier 1     |    | Qualifier 2    |    |
|---------|----------------------|------------|----------------|----|-----------------|----|----------------|----|
|         |                      | m/z        | m/z            | CE | m/z             | CE | m/z            | CE |
| 48-68   | AVCGGVLVHPQWVLTAHCIR | 586.8 (4+) | 544.3 (b6, 1+) | 12 | 941.5 (y8, 1+)  | 25 | 726.4 (y6, 1+) | 15 |
| 110-125 | FLRPGDDSSHDLMLLR     | 468.7 (4+) | 532.3 (y4, 1+) | 15 | 760.4 (y6, 1+)  | 18 | 645.4 (y5, 1+) | 18 |
| 251-261 | KWIKDTIVANP          | 428.9 (3+) | 116.1 (y1, 1+) | 10 | 1055.6 (b9, 1+) | 12 | 885.5 (b7, 1+) | 15 |
| -       | SIL-FLRPGDDSSHDLMLLR | 471.2 (4+) | 542.3 (y4, 1+) | 15 | 770.4 (y6, 1+)  | 18 | 655.4 (y5, 1+) | 18 |
| -       | SIL-KWIKDTIVANP      | 430.9 (3+) | 116.1 (y1, 1+) | 10 | 1061.6 (b9, 1+) | 12 | 885.5 (b7, 1+) | 15 |
| 69-77   | NKSVILLGR-H5N4F1S2   | 1117.5     | 204.0 (1+)     | 30 | 274.0 (1+)      | 30 | -              | -  |
| 69-77   | NKSVILLGR-H5N4F0S2   | 1068.8     | 204.0 (1+)     | 30 | 274.0 (1+)      | 30 | -              | -  |
| 69-77   | NKSVILLGR-H4N5F1S2   | 1131.2     | 204.0 (1+)     | 30 | 274.0 (1+)      | 30 | -              | -  |
| 69-77   | NKSVILLGR-H4N5F0S2   | 1082.5     | 204.0 (1+)     | 30 | 274.0 (1+)      | 30 | -              | -  |
| 69-77   | NKSVILLGR-H3N6F1S2   | 1144.8     | 204.0 (1+)     | 30 | 274.0 (1+)      | 30 | -              | -  |
| 69-77   | NKSVILLGR-H5N4F1S1   | 1020.5     | 204.0 (1+)     | 30 | 274.0 (1+)      | 30 | -              | -  |
| 69-77   | NKSVILLGR-H4N3F1S1   | 898.7      | 204.0 (1+)     | 30 | 274.0 (1+)      | 30 | -              | -  |
| 69-77   | NKSVILLGR-H4N3F0S1   | 850.1      | 204.0 (1+)     | 30 | 274.0 (1+)      | 30 | -              | -  |
| 69-77   | NKSVILLGR-H3N4F1S1   | 912.4      | 204.0 (1+)     | 30 | 274.0 (1+)      | 30 | -              | -  |
| 69-77   | NKSVILLGR-H5N4F1S0   | 923.4      | 204.0 (1+)     | 30 | 366.0 (1+)      | 30 | -              | -  |
| 69-77   | NKSVILLGR-H4N3F1S0   | 801.7      | 204.0 (1+)     | 30 | 366.0 (1+)      | 30 | -              | -  |
| 69-77   | NKSVILLGR-H4N4F1S0   | 869.4      | 204.0 (1+)     | 30 | 366.0 (1+)      | 30 | -              | -  |
| 69-77   | NKSVILLGR-H4N5F1S0   | 937.1      | 204.0 (1+)     | 30 | 366.0 (1+)      | 30 | -              | -  |

| Condition | Buffer      | CaCl <sub>2</sub> | EDTA  | ArgC |
|-----------|-------------|-------------------|-------|------|
| 1         | 50 mM TRIS  | 50 mM             | 50 mM | 1:35 |
| 2         | 50 mM TRIS  | 50 mM             | 50 mM | 1:20 |
| 3         | 50 mM TRIS  | 50 mM             | 50 mM | 1:10 |
| 4         | 50 mM TRIS  | 50 mM             | 50 mM | 1:5  |
| 5         | 50 mM TRIS  | 50 mM             | 0 mM  | 1:35 |
| 6         | 50 mM TRIS  | 0 mM              | 50 mM | 1:35 |
| 7         | 50 mM TRIS  | 0 mM              | 0 mM  | 1:35 |
| 8         | 50 mM TRIS  | 5 mM              | 0 mM  | 1:35 |
| 9         | 50 mM TRIS  | 20 mM             | 0 mM  | 1:35 |
| 10        | 10 mM TRIS  | 0 mM              | 0 mM  | 1:35 |
| 11        | 100 mM TRIS | 0 mM              | 0 mM  | 1:35 |
| 12        | 50 mM ABC   | 5 mM              | 0 mM  | 1:35 |
| 13        | 50 mM ABC   | 50 mM             | 0 mM  | 1:35 |

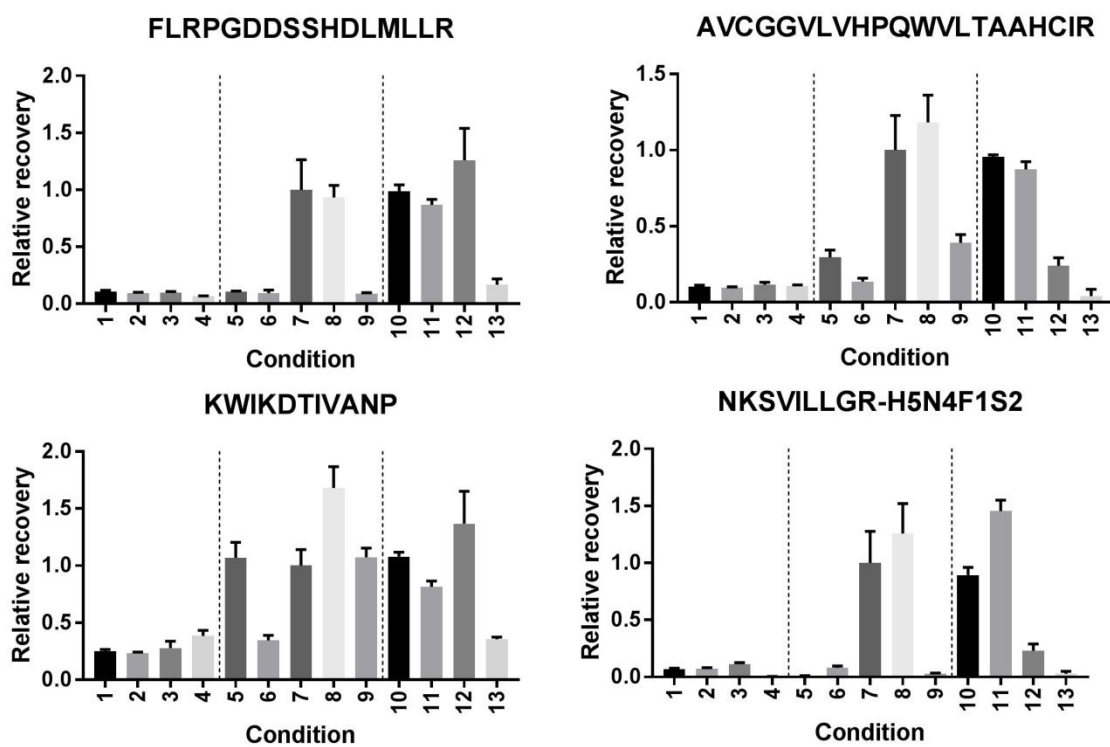

Supplementary Figure S1. Optimization of digestion conditions.

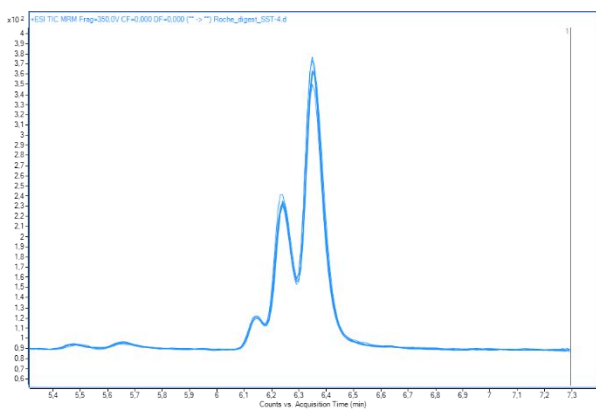

**Supplementary Figure S2.** Overlay of seven analyses of a PSA standard digest (for experimental details, see the main publication, experimental section). These digests were measured over a 48 h. time interval. The injection volume was reduced to 1  $\mu$ L to allow for a larger number of injections from the same vial. These results indicate the repeatability of the LC-MRM-MS measurement both in terms of quantitation as well as retention time.
